# Supplementary material
Source: HighWire-hosted journal article supplement (http://www.cmaj.ca/highwire/filestream/58316/field_highwire_adjunct_files/0/test-dend-1-at_online_.pdf)
Supplement: test-dend-1-at_online_.pdf [file test-dend-1-at_online_.pdf]

**Appendix 1:** Estimated percentage of true-positive, true-negative, false-positive and false-negative results expected with each testing strategy used to determine HER2 status

| Testing strategy†               | Type of result; % of patients, median (95% credible interval)* |                |               |                | % of patients who would receive trastuzumab (95% credible interval)* |
|---------------------------------|----------------------------------------------------------------|----------------|---------------|----------------|----------------------------------------------------------------------|
|                                 | True positive                                                  | False positive | True negative | False negative |                                                                      |
| Strategy 1 (base strategy)      | 19 (14-25)                                                     | 1 (0.6-2)      | 78 (72-83)    | 2 (1-3)        | 20 (15-27)                                                           |
| Strategy 2                      | 19 (14-25)                                                     | 9 (4-17)       | 69 (62-76)    | 2 (1-3)        | 28 (22-36)                                                           |
| Strategy 3                      | 15 (10-21)                                                     | 1 (0.6-2)      | 78 (72-83)    | 6 (3-11)       | 16 (11-23)                                                           |
| Strategy 4                      | 21 (16-26)                                                     | 1 (0.6-2)      | 78 (72-83)    | 0.6 (0-1)      | 21 (16-28)                                                           |
| Strategy 5 (selected strategy‡) | 19 (14-25)                                                     | 0              | 79 (73-84)    | 2 (1-3)        | 19 (14-25)                                                           |
| Strategy 6                      | 21 (16-26)                                                     | 0              | 79 (73-84)    | 0.6 (0-1)      | 20 (15-26)                                                           |
| Strategy 7                      | 21 (16-27)                                                     | 0              | 79 (73-84)    | 0              | 21 (16-27)                                                           |

\*Percentages in each row may not add to 100 owing to rounding.

†See Table 1 for descriptions of testing strategies.

‡Selected as having the lowest incremental cost-effectiveness ratio.
